# Supplementary material for: Validation and Data-Integration of Yeast-Based Assays for Functional Classification of BRCA1 Missense Variants
Source: Int J Mol Sci. 2022 Apr 6;23(7):4049. doi: 10.3390/ijms23074049 (PMC8999655; doi:10.3390/ijms23074049)
Supplement: Supplementary file 1 [file ijms-23-04049-s001.zip]

Archive with 8 entries (8 files):
- Figures S1 and S2.pdf
- Table S1.xlsx
- Table S2.xlsx
- Table S3.xlsx
- Table S4.xlsx
- Table S5.xlsx
- Table S6.xlsx
- Table S7.xlsx
