# Supplementary material for: Validation and Data-Integration of Yeast-Based Assays for Functional Classification of BRCA1 Missense Variants
Source: Int J Mol Sci. 2022 Apr 6;23(7):4049. doi: 10.3390/ijms23074049 (PMC8999655; doi:10.3390/ijms23074049)
Supplement: Supplementary file 1 [file ijms-23-04049-s001.zip › Table S1.xlsx]

## Sheet: Table S1
Table S1: BRCA1 missense variants selected in this study
Variant	HGVS variants nomenclature		BRCA Exchange	ClinVar	Varsome
L22S	p.Leu22Ser	c.65T>C	Pathogenic	Pathogenic	Pathogenic
T37K	p.Thr37Lys	c.110C>A	Pathogenic	Pathogenic	Pathogenic
C39G	p.Cys39Arg	c.115T>C	Pathogenic	Likely pathogenic​	Pathogenic
C39Y	p.Cys39Tye	c.116G>A	Not Yet Reviewed	Pathogenic	Pathogenic
C44F	p.Cys44Phe	c.131G>T	Pathogenic	not provided​	Pathogenic
C44Y	p.Cys44Tyr	c.131G>A	Pathogenic	Pathogenic	Pathogenic
K45Q	p.Lys45Gln	c.133A>C	Benign/Little Clinical Significance	Benign	Uncertain Significance
C47G	p.Cys47Gly	c.139T>G	Not Yet Reviewed	Likely pathogenic​	Likely pathogenic​
C61G	p.Cys61Gly	c.181T>G	Pathogenic	Pathogenic	Pathogenic
C64R	p.Cys64Arg	c.190T>C	Pathogenic	Pathogenic	Pathogenic
D67Y	p.Asp67Tyr	c.199G>T	Benign/Little Clinical Significance	Benign	Likely Benign
R71K	p.Arg71Lys	c.212G>A	Not Yet Reviewed	Pathogenic	Pathogenic
N132K	p.Asn132Lys	c.396C>A	Benign/Little Clinical Significance	Benign	Likely Benign
Y179C	p.Tyr179Cys	c.536A>G	Benign/Little Clinical Significance	Benign	Likely Benign
L246V	p.Leu246Val	c.736T>G	Benign/Little Clinical Significance	Benign	Uncertain Significance
Q356R	p.Gln8356Arg	c.1067A>G	Benign/Little Clinical Significance	Benign	Benign
F486L	p.Phe486Leu	c.1456T>C	Benign/Little Clinical Significance	Likely Benign	Benign
N550H	p.Asn550His	c.1648A>C	Benign/Little Clinical Significance	Likely Benign	Likely Benign
S592N	p.Ser592Asn	c.1775G>A	Not Yet Reviewed	Uncertain Significance	Uncertain Significance
A622V	p.Ala622Val	c.1865C>T	Benign/Little Clinical Significance	Benign	Benign
Q804H	p.Gln804His	c.2412G>C	Benign/Little Clinical Significance	Benign	Benign
T826K	p.Thr826Lys	c.2596C>A	Benign/Little Clinical Significance	Benign	Benign
R841W	p.Arg841Trp	c.2640C>T	Benign/Little Clinical Significance	Benign	Benign
P1010S	p.Pro1010Ser	c.3028C>T	Not Yet Reviewed	Uncertain Significance	Uncertain Significance
S1040N	p.Ser1040Asn	c.3119G>A	Benign/Little Clinical Significance	Benign	Benign
S1140G	p.Ser1140Gly	c.3418A>G	Benign/Little Clinical Significance	Benign	Benign
S1164I	p.Ser1164Ile	c.3491G>T	Not Yet Reviewed	Uncertain Significance	Uncertain Significance
I1275V	p.Ile1275Val	c.3823A>G	Benign/Little Clinical Significance	Benign	Benign
R1347G	p.Arg1377Gly	c.4039A>G	Benign/Little Clinical Significance	Benign	Benign
E1352K	p.Glu1352Lys	c.4054G>A	Not Yet Reviewed	Uncertain Significance	Uncertain Significance
R1495M	p.Arg1495Met	c.4484G>T	Not Yet Reviewed	Pathogenic	Pathogenic
S1512I	p.Ser1512Ile	c.4535G>T	Benign/Little Clinical Significance	Benign	Benign
F1662S	p.Phe1662Ser	c.4985T>C	Benign/Little Clinical Significance	Benign	Benign
A1669S	p.Ala1669Ser	c.5005G>T	Not Yet Reviewed	Likely benign	Uncertain Significance
T1675I	p.Thr1675Ile	c.5024C>T	Benign/Little Clinical Significance	Benign	Benign
T1685A	p.Thr1685Ala	c.5053A>G	Pathogenic	Pathogenic	Pathogenic
M1689R	p.Met1689Arg	c.5066T>G	Not Yet Reviewed	Pathogenic	Pathogenic
R1699W	p.Arg1699Trp	c.5095C>T	Pathogenic	Pathogenic	Pathogenic
Y1703C	p.Tyr1703Cys	c.5108A>G	Not Yet Reviewed	Uncertain Significance	Uncertain Significance
G1706E	p.Gly1706Glu	c.5117G>A	Pathogenic	Pathogenic	Pathogenic
A1708E	p.Ala1708Glu	c.5123C>A	Pathogenic	Pathogenic	Pathogenic
S1715R	p.Ser1715Arg	c.5143A>C	Pathogenic	Pathogenic	Pathogenic
T1720A	p.Thr1720Ala	c.5158A>G	Benign/Little Clinical Significance	Benign	Benign
N1730I	p.Asn1730Ile	c.5189A>T	Not Yet Reviewed	Uncertain Significance	Uncertain Significance
G1738R	p.Gly1738Arg	c.5212G>A	Pathogenic	Pathogenic	Pathogenic
L1764P	p.Leu1764Pro	c.5291T>C	Pathogenic	Pathogenic	Pathogenic
I1766S	p.Ile1766Ser	c.5297T>G	Pathogenic	Pathogenic	Pathogenic
M1775R	p.Met1775Lys	c.5324T>A	Pathogenic	Pathogenic	Pathogenic
P1776H	p.Ile1858Leu	c.5327C>A	Not Yet Reviewed	Likely Benign	Benign
G1788V	p.Gly1788Val	c.5363G>T	Pathogenic	Pathogenic	Pathogenic
A1789T	p.Ala1789Thr	c.5365G>A	Not Yet Reviewed	Uncertain Significance	Uncertain Significance
V1791L	p.Val1791Leu	c.5371G> T	Not Yet Reviewed	Uncertain Significance	Uncertain Significance
N1819S	p.Asn1819Ser	c.5456A>G	Not Yet Reviewed	Uncertain Significance	Uncertain Significance
V1838E	p.Val1838Glu	c.5513T>A	Pathogenic	Pathogenic	Pathogenic
I1858L	p.Pro1859Arg	c.5572A>C	Benign/Little Clinical Significance	Benign	Benign
P1859R	p.Pro1859Arg	c.5576C>G	Benign/Little Clinical Significance	Benign	Benign
For each BRCA1 misense variants the Human Genome Variation Society (HGVS) nomenclature and classification annotated in BRCA Exchange (https://brcaexchange.org/),
ClinVar (https://www.ncbi.nlm.nih.gov/clinvar/) and VarSome (https://varsome.com/) databases are reported. Pathogenic, Benign and VUS are reported in red, blue and black
