# Supplementary material for: Validation and Data-Integration of Yeast-Based Assays for Functional Classification of BRCA1 Missense Variants
Source: Int J Mol Sci. 2022 Apr 6;23(7):4049. doi: 10.3390/ijms23074049 (PMC8999655; doi:10.3390/ijms23074049)
Supplement: Supplementary file 1 [file ijms-23-04049-s001.zip › Table S2.xlsx]

## Sheet: Table S2
Table S2: Effect of BRCA1 missense variants on intra-chromosomal HR assay
Name	Batch1	Batch2	Batch3	Batch4	Batch5	Batch6	Batch7	Batch8	Batch9	Batch10	Batch11	Batch12	Batch13	Batch14	Batch15	Mean	Median	NSample	Prior_classif
A1669S	1.38393	1.86869	1.36098	1.13761	1.58076	NA	NA	NA	NA	NA	NA	NA	NA	NA	NA	1.46639	1.38393	5	VUS
A1708E	1.61	2.88	1.46	1.6	1.31	NA	NA	NA	NA	NA	NA	NA	NA	NA	NA	1.772	1.6	5	Pathogenic
A1789T	0.65	0.68	0.99	0.72	0.88	NA	NA	NA	NA	NA	NA	NA	NA	NA	NA	0.784	0.72	5	VUS
A622V	0.85389	1.24125	0.607287	0.801833	0.936266	NA	NA	NA	NA	NA	NA	NA	NA	NA	NA	0.888105	0.85389	5	Benign
C39G	5.85526	4.49102	7.3913	6.82243	6.7834	NA	NA	NA	NA	NA	NA	NA	NA	NA	NA	6.26868	6.7834	5	Pathogenic
C39Y	8.44444	13.9167	5.33333	6.34328	6.51278	NA	NA	NA	NA	NA	NA	NA	NA	NA	NA	8.1101	6.51278	5	Pathogenic
C44F	15.4118	19.0753	12.6498	12.1943	13.22	NA	NA	NA	NA	NA	NA	NA	NA	NA	NA	14.5102	13.22	5	Pathogenic
C44Y	4.10753	3.30623	2.69542	2.65446	2.31986	NA	NA	NA	NA	NA	NA	NA	NA	NA	NA	3.0167	2.69542	5	Pathogenic
C47G	2.88603	2.89474	3.365	3.7623	2.87	NA	NA	NA	NA	NA	NA	NA	NA	NA	NA	3.15561	2.89474	5	Pathogenic
C61G	4.52	3.17	2.35	3.06	2.59	NA	NA	NA	NA	NA	NA	NA	NA	NA	NA	3.138	3.06	5	Pathogenic
C64R	1.81467	5.76531	2.11382	1.72786	1.95	NA	NA	NA	NA	NA	NA	NA	NA	NA	NA	2.67433	1.95	5	Pathogenic
D67Y	0.857143	0.86514	0.774963	0.615385	0.675	NA	NA	NA	NA	NA	NA	NA	NA	NA	NA	0.757526	0.774963	5	Benign
E1352K	1.32159	6.39968	2.04489	2.16667	3.84	2.54587	1.0411	NA	NA	NA	NA	NA	NA	NA	NA	2.76568	2.16667	7	VUS
F1662S	0.653266	0.60686	1.80479	0.695876	1.2	NA	NA	NA	NA	NA	NA	NA	NA	NA	NA	0.992158	0.695876	5	Benign
F486L	0.38	0.51	0.56	0.58	0.89	NA	NA	NA	NA	NA	NA	NA	NA	NA	NA	0.584	0.56	5	Benign
G1706E	2.92793	2.51453	4.82654	3.365	2.814	NA	NA	NA	NA	NA	NA	NA	NA	NA	NA	3.2896	2.92793	5	Pathogenic
G1738R	3.02632	3.27684	4.11502	3.28492	3.97781	NA	NA	NA	NA	NA	NA	NA	NA	NA	NA	3.53618	3.28492	5	Pathogenic
G1788V	62.78	37.83	44.35	37.87	38.45	NA	NA	NA	NA	NA	NA	NA	NA	NA	NA	44.256	38.45	5	Pathogenic
I1275V	2.20732	3.55932	1.03659	2.66667	2.91667	NA	NA	NA	NA	NA	NA	NA	NA	NA	NA	2.47731	2.66667	5	Benign
I1766S	4.59	3.37	2.59	1.99	3.69	NA	NA	NA	NA	NA	NA	NA	NA	NA	NA	3.246	3.37	5	Pathogenic
I1858L	1.74566	1.68224	1.29412	0.711961	1.33774	NA	NA	NA	NA	NA	NA	NA	NA	NA	NA	1.35434	1.33774	5	Benign
K45Q	0.18	1.57	1.49	0.35	0.43	NA	NA	NA	NA	NA	NA	NA	NA	NA	NA	0.804	0.43	5	Benign
L1764P	6.47059	7.27273	9.36	7.12121	7.89	NA	NA	NA	NA	NA	NA	NA	NA	NA	NA	7.62291	7.27273	5	Pathogenic
L22S	1.47	1.93	1.49	1.66	1.6	NA	NA	NA	NA	NA	NA	NA	NA	NA	NA	1.63	1.6	5	Pathogenic
L246V	1.04803	1.94053	1.43443	1.1976	1.10132	NA	NA	NA	NA	NA	NA	NA	NA	NA	NA	1.34438	1.1976	5	Benign
M1689R	3.28571	3.70787	6.30645	3.97759	3.24385	NA	NA	NA	NA	NA	NA	NA	NA	NA	NA	4.10429	3.70787	5	Pathogenic
M1775R	2.46	3.61	2.43	3.69	2.65	NA	NA	NA	NA	NA	NA	NA	NA	NA	NA	2.968	2.65	5	Pathogenic
N132K	0.94	1.47	2.18	2.7	0.74	NA	NA	NA	NA	NA	NA	NA	NA	NA	NA	1.606	1.47	5	Benign
N1730I	5.79143	6.49194	1.72031	1.91388	3.17406	1.98874	1.33971	NA	NA	NA	NA	NA	NA	NA	NA	3.20287	1.98874	7	VUS
N1819S	1.21457	6.33342	1.61972	1.0302	2.72527	1.17493	NA	NA	NA	NA	NA	NA	NA	NA	NA	2.34969	1.41715	6	VUS
N550H	0.8	1.19	0.45	1.78	0.89	NA	NA	NA	NA	NA	NA	NA	NA	NA	NA	1.022	0.89	5	Benign
P1010S	1.25	0.67	1.52	1.14	1.02	NA	NA	NA	NA	NA	NA	NA	NA	NA	NA	1.12	1.14	5	VUS
P1776H	2.57143	3.11111	2.25309	0.926966	2.22278	NA	NA	NA	NA	NA	NA	NA	NA	NA	NA	2.21707	2.25309	5	Benign
P1859R	1.14013	0.726384	1.01554	0.981997	0.894715	NA	NA	NA	NA	NA	NA	NA	NA	NA	NA	0.951755	0.981997	5	Benign
pYES2	1.49556	0.722222	0.68	0.579345	0.65	0.65	0.722222	0.533333	0.99	0.79	0.58	0.41	1	0.97	0.94	0.780846	0.722222	15	Other.reference
Q356R	1.21308	1.15044	0.912331	0.771828	0.802042	NA	NA	NA	NA	NA	NA	NA	NA	NA	NA	0.969945	0.912331	5	Benign
Q804H	0.797314	0.967366	0.7173	0.964912	0.945068	NA	NA	NA	NA	NA	NA	NA	NA	NA	NA	0.878392	0.945068	5	Benign
R1347G	5.22727	3.47826	3.66667	6.40074	5.05092	NA	NA	NA	NA	NA	NA	NA	NA	NA	NA	4.76477	5.05092	5	Benign
R1495M	3.94	2.89	4.34	5.6	4.12	NA	NA	NA	NA	NA	NA	NA	NA	NA	NA	4.178	4.12	5	Pathogenic
R1699W	5.64103	6.09948	2.98456	2.2931	3.06927	NA	NA	NA	NA	NA	NA	NA	NA	NA	NA	4.01749	3.06927	5	Pathogenic
R71K	1.35	0.743872	0.593047	1.234	0.989	NA	NA	NA	NA	NA	NA	NA	NA	NA	NA	0.981984	0.989	5	Pathogenic
R841W	1.35953	1.06805	0.944123	1.53759	0.966387	NA	NA	NA	NA	NA	NA	NA	NA	NA	NA	1.17514	1.06805	5	Benign
S1040N	1.22	0.89	1.11	1.39	1.012	NA	NA	NA	NA	NA	NA	NA	NA	NA	NA	1.1244	1.11	5	Benign
S1140G	1.34	1.08	1.73	1.13	1.58	NA	NA	NA	NA	NA	NA	NA	NA	NA	NA	1.372	1.34	5	Benign
S1164I	2.45	3.15	3.97	2.58	2.82	NA	NA	NA	NA	NA	NA	NA	NA	NA	NA	2.994	2.82	5	VUS
S1512I	1.41	2.66	3.03	1.88	1.01	NA	NA	NA	NA	NA	NA	NA	NA	NA	NA	1.998	1.88	5	Benign
S1715R	23.963	20.4244	21.1617	18.1777	20.78	NA	NA	NA	NA	NA	NA	NA	NA	NA	NA	20.9014	20.78	5	Pathogenic
S592N	2.96053	6.48331	2.36111	2.57848	4.82342	0.943396	NA	NA	NA	NA	NA	NA	NA	NA	NA	3.35837	2.7695	6	VUS
T1675I	0.448029	0.319149	0.533333	0.456733	0.67	NA	NA	NA	NA	NA	NA	NA	NA	NA	NA	0.485449	0.456733	5	Benign
T1685A	5.5	4.63636	4.84566	7.51215	5.42049	NA	NA	NA	NA	NA	NA	NA	NA	NA	NA	5.58293	5.42049	5	Pathogenic
T1720A	1.59	2.07	0.62	0.61	0.551724	NA	NA	NA	NA	NA	NA	NA	NA	NA	NA	1.08834	0.62	5	Benign
T37K	3.96509	2.35294	2.289	2.66145	2.51029	2.28029	NA	NA	NA	NA	NA	NA	NA	NA	NA	2.67651	2.43161	6	Pathogenic
T826K	0.702703	0.501608	0.781022	0.7075	0.549738	NA	NA	NA	NA	NA	NA	NA	NA	NA	NA	0.648514	0.702703	5	Benign
V1791L	2.65957	1.86047	1.28788	1.39	1.79	NA	NA	NA	NA	NA	NA	NA	NA	NA	NA	1.79758	1.79	5	VUS
V1838E	4.4375	4.34783	5.03759	5.22388	5.42049	NA	NA	NA	NA	NA	NA	NA	NA	NA	NA	4.89346	5.03759	5	Pathogenic
wt	1.03226	0.869565	0.536585	0.854093	0.830325	0.904762	0.458404	0.576324	0.92	0.86	0.29	0.619048	0.668085	0.86215	1.03464	0.754416	0.854093	15	WT.reference
Y1703C	1.83824	1.03175	2.30769	1.77711	2.14	NA	NA	NA	NA	NA	NA	NA	NA	NA	NA	1.81896	1.83824	5	VUS
Y179C	1.78	1.41	3.13	1.83	1.37	NA	NA	NA	NA	NA	NA	NA	NA	NA	NA	1.904	1.78	5	Benign
Results expressed Intra-chromosomal HR frequency, are reported for any independent experiment. Mean, median and prior classification are also reported
