# Supplementary material for: Validation and Data-Integration of Yeast-Based Assays for Functional Classification of BRCA1 Missense Variants
Source: Int J Mol Sci. 2022 Apr 6;23(7):4049. doi: 10.3390/ijms23074049 (PMC8999655; doi:10.3390/ijms23074049)
Supplement: Supplementary file 1 [file ijms-23-04049-s001.zip › Table S3.xlsx]

## Sheet: Table S3
Table S3: Effect of BRCA1 missense variants on inter-chromosomal HR assay
Name	Batch1	Batch2	Batch3	Batch4	Batch5	Batch6	Batch7	Batch8	Batch9	Batch10	Batch11	Batch12	Batch13	Batch14	Batch15	Mean	Median	NSample	Prior_classif
A1669S	1.51786	1.80135	1.8126	1.04587	1.37457	NA	NA	NA	NA	NA	NA	NA	NA	NA	NA	1.51045	1.51786	5	VUS
A1708E	0.67	0.81	1.86	1.83	0.75	1.02	NA	NA	NA	NA	NA	NA	NA	NA	NA	1.15667	0.915	6	Pathogenic
A1789T	0.7	0.67	0.98	0.91	0.57	0.79	NA	NA	NA	NA	NA	NA	NA	NA	NA	0.77	0.745	6	VUS
A622V	0.364326	0.760616	0.824899	0.761741	0.806543	NA	NA	NA	NA	NA	NA	NA	NA	NA	NA	0.703625	0.761741	5	Benign
C39G	1.67763	2.99401	2.80374	2.25	2.79	NA	NA	NA	NA	NA	NA	NA	NA	NA	NA	2.50308	2.79	5	Pathogenic
C39Y	2.83333	2.09524	2.31343	1.86315	3.69091	NA	NA	NA	NA	NA	NA	NA	NA	NA	NA	2.55921	2.31343	5	Pathogenic
C44F	3.33333	3.76712	3.52535	2.93132	2.2914	NA	NA	NA	NA	NA	NA	NA	NA	NA	NA	3.1697	3.33333	5	Pathogenic
C44Y	3.69892	3.38753	3.18059	1.83066	2.12654	NA	NA	NA	NA	NA	NA	NA	NA	NA	NA	2.84485	3.18059	5	Pathogenic
C47G	1.79426	2.01923	1.89	2.11	1.24106	NA	NA	NA	NA	NA	NA	NA	NA	NA	NA	1.81091	1.89	5	Pathogenic
C61G	1.8	2.03	1.85	2.06	2.25	2.04	NA	NA	NA	NA	NA	NA	NA	NA	NA	2.005	2.035	6	Pathogenic
C64R	4.16988	2.21939	2.22222	3.88769	2.675	NA	NA	NA	NA	NA	NA	NA	NA	NA	NA	3.03484	2.675	5	Pathogenic
D67Y	0.5	0.737913	0.685544	0.507692	0.486111	NA	NA	NA	NA	NA	NA	NA	NA	NA	NA	0.583452	0.507692	5	Benign
E1352K	0.772059	0.623441	0.679487	1.24413	0.894495	NA	NA	NA	NA	NA	NA	NA	NA	NA	NA	0.842723	0.772059	5	VUS
F1662S	0.268007	0.237467	0.515654	0.335052	0.552764	NA	NA	NA	NA	NA	NA	NA	NA	NA	NA	0.381789	0.335052	5	Benign
F486L	0.49	0.51	0.43	0.47	0.76	0.77	NA	NA	NA	NA	NA	NA	NA	NA	NA	0.571667	0.5	6	Benign
G1706E	2.20721	3.4337	2.74501	1.87	2.11	NA	NA	NA	NA	NA	NA	NA	NA	NA	NA	2.47318	2.20721	5	Pathogenic
G1738R	2.01754	2.05273	2.15655	1.84358	2.36022	NA	NA	NA	NA	NA	NA	NA	NA	NA	NA	2.08612	2.05273	5	Pathogenic
G1788V	1.98	2.12	1.16	2.58	2.30796	NA	NA	NA	NA	NA	NA	NA	NA	NA	NA	2.02959	2.12	5	Pathogenic
I1275V	1.09756	1.77778	2	2.54545	1.55709	NA	NA	NA	NA	NA	NA	NA	NA	NA	NA	1.79558	1.77778	5	Benign
I1766S	1.46	1.95	1.42	1.42	1.78	NA	NA	NA	NA	NA	NA	NA	NA	NA	NA	1.606	1.46	5	Pathogenic
I1858L	0.654206	0.570093	0.623529	0.391579	0.77	NA	NA	NA	NA	NA	NA	NA	NA	NA	NA	0.601881	0.623529	5	Benign
K45Q	0.4	0.23	0.48	0.43	0.48	NA	NA	NA	NA	NA	NA	NA	NA	NA	NA	0.404	0.43	5	Benign
L1764P	2.75207	3.25758	2.41379	2.24	1.99	NA	NA	NA	NA	NA	NA	NA	NA	NA	NA	2.53069	2.41379	5	Pathogenic
L22S	1.57	1.49	2.11	1.89	1.25	NA	NA	NA	NA	NA	NA	NA	NA	NA	NA	1.662	1.57	5	Pathogenic
L246V	0.873362	1.11111	1.02423	1.42602	0.532787	1.1617	1.54972	NA	NA	NA	NA	NA	NA	NA	NA	1.09699	1.11111	7	Benign
M1689R	2.21429	1.96629	1.40323	1.55462	1.34228	NA	NA	NA	NA	NA	NA	NA	NA	NA	NA	1.69614	1.55462	5	Pathogenic
M1775R	1.93	1.77	2.55	1.41	1.32	NA	NA	NA	NA	NA	NA	NA	NA	NA	NA	1.796	1.77	5	Pathogenic
N132K	1.33	0.81	1.45	1.64	0.94	0.84	0.91	NA	NA	NA	NA	NA	NA	NA	NA	1.13143	0.94	7	Benign
N1730I	0.670391	0.524194	0.332963	0.637959	0.844278	NA	NA	NA	NA	NA	NA	NA	NA	NA	NA	0.601957	0.637958	5	VUS
N1819S	0.728745	0.487805	0.96	1.13677	0.951157	1.15044	NA	NA	NA	NA	NA	NA	NA	NA	NA	0.902486	0.955578	6	VUS
N550H	0.42	0.75	0.57	1.38	0.8	0.28	NA	NA	NA	NA	NA	NA	NA	NA	NA	0.7	0.66	6	Benign
P1010S	2.39	1.31	0.82	2.07	1.47	1.05	NA	NA	NA	NA	NA	NA	NA	NA	NA	1.51833	1.39	6	VUS
P1776H	1.87952	1.03704	1.01852	0.702247	1.47015	NA	NA	NA	NA	NA	NA	NA	NA	NA	NA	1.22149	1.03704	5	Benign
P1859R	0.469467	0.856678	0.792746	1.03655	0.830882	NA	NA	NA	NA	NA	NA	NA	NA	NA	NA	0.797265	0.830882	5	Benign
pYES2	0.836502	0.888889	0.52	0.70529	0.596	0.596	0.64	0.87	0.49	0.8	0.64	0.82	0.93	0.86	0.65	0.722845	0.70529	15	Other.reference
Q356R	0.949367	0.884956	0.616536	0.723589	0.619759	0.843882	NA	NA	NA	NA	NA	NA	NA	NA	NA	0.773015	0.783735	6	Benign
Q804H	0.390264	0.396825	0.699301	0.57384	0.605948	0.980508	NA	NA	NA	NA	NA	NA	NA	NA	NA	0.607781	0.589894	6	Benign
R1347G	0.75	1.26667	0.815451	0.798371	1.39147	0.863132	0.803314	NA	NA	NA	NA	NA	NA	NA	NA	0.955486	0.815451	7	Benign
R1495M	2.56	2.89	4.6	2.89	3.02	NA	NA	NA	NA	NA	NA	NA	NA	NA	NA	3.192	2.89	5	Pathogenic
R1699W	1.51282	1.38743	0.926244	0.87931	0.607959	NA	NA	NA	NA	NA	NA	NA	NA	NA	NA	1.06275	0.926244	5	Pathogenic
R71K	0.39313	0.224007	0.262927	0.27	0.254777	NA	NA	NA	NA	NA	NA	NA	NA	NA	NA	0.280968	0.262927	5	Pathogenic
R841W	0.775358	1.02079	0.799615	0.888383	0.756303	0.737513	NA	NA	NA	NA	NA	NA	NA	NA	NA	0.829661	0.787487	6	Benign
S1040N	1	1.11	0.89	1.89	0.99	NA	NA	NA	NA	NA	NA	NA	NA	NA	NA	1.176	1	5	Benign
S1140G	1.18	1.1	0.9	1.22	1.25	NA	NA	NA	NA	NA	NA	NA	NA	NA	NA	1.13	1.18	5	Benign
S1164I	2.05	3.01	2.45	2.34	2.41	NA	NA	NA	NA	NA	NA	NA	NA	NA	NA	2.452	2.41	5	VUS
S1512I	0.78	1.3	1.76	0.89	0.91	1.74	NA	NA	NA	NA	NA	NA	NA	NA	NA	1.23	1.105	6	Benign
S1715R	2.87474	3.28912	3.82688	3.41686	2.7707	NA	NA	NA	NA	NA	NA	NA	NA	NA	NA	3.23566	3.28912	5	Pathogenic
S592N	0.877193	1.53271	0.416667	0.73991	0.762082	NA	NA	NA	NA	NA	NA	NA	NA	NA	NA	0.865712	0.762082	5	VUS
T1675I	0.358423	0.595745	0.595745	0.76	0.393236	NA	NA	NA	NA	NA	NA	NA	NA	NA	NA	0.54063	0.595745	5	Benign
T1685A	2.30864	2.29839	1.518	2.90761	3.13084	NA	NA	NA	NA	NA	NA	NA	NA	NA	NA	2.4327	2.30864	5	Pathogenic
T1720A	0.24	0.38	0.32	0.33	0.367816	NA	NA	NA	NA	NA	NA	NA	NA	NA	NA	0.327563	0.33	5	Benign
T37K	4.68828	3.03922	1.90537	2.38748	2.26337	2.32779	NA	NA	NA	NA	NA	NA	NA	NA	NA	2.76858	2.35763	6	Pathogenic
T826K	0.540541	0.363344	0.375	0.78534	0.616935	NA	NA	NA	NA	NA	NA	NA	NA	NA	NA	0.536232	0.54054	5	Benign
V1791L	3.40426	2.0155	2.57576	3.67	2.80836	NA	NA	NA	NA	NA	NA	NA	NA	NA	NA	2.89478	2.80836	5	VUS
V1838E	2.25	1.95652	3.35821	1.95	1.96194	NA	NA	NA	NA	NA	NA	NA	NA	NA	NA	2.29533	1.96194	5	Pathogenic
wt	0.564516	0.434783	0.560976	0.604982	0.382095	0.382095	0.433213	0.356537	0.825545	0.52	0.70529	0.596	0.26	0.44	0.49	0.503735	0.49	15	WT.reference
Y1703C	4.04412	4.28571	2.92308	4.11	4.27227	NA	NA	NA	NA	NA	NA	NA	NA	NA	NA	3.92704	4.11	5	VUS
Y179C	2.69	1.26	1.44	1.61	2	NA	NA	NA	NA	NA	NA	NA	NA	NA	NA	1.8	1.61	5	Benign
Results expressed Inter-chromosomal HR frequency, are reported for any independent experiment. Mean, median and prior classification are also reported
