# Supplementary material for: Validation and Data-Integration of Yeast-Based Assays for Functional Classification of BRCA1 Missense Variants
Source: Int J Mol Sci. 2022 Apr 6;23(7):4049. doi: 10.3390/ijms23074049 (PMC8999655; doi:10.3390/ijms23074049)
Supplement: Supplementary file 1 [file ijms-23-04049-s001.zip › Table S4.xlsx]

## Sheet: Table S4
Table S4: Effect of BRCA1 missense variants on GR assay
Name	Batch1	Batch2	Batch3	Batch4	Batch5	Batch6	Batch7	Batch8	Batch9	Batch10	Batch11	Batch12	Batch13	Batch14	Batch15	Mean	Median	NSample	Prior_classif
A1669S	0.517756	0.643087	0.621257	0.722772	0.782123	NA	NA	NA	NA	NA	NA	NA	NA	NA	NA	0.657399	0.643087	5	VUS
A1708E	1.24793	0.894737	1.03492	1.26	1.19	NA	NA	NA	NA	NA	NA	NA	NA	NA	NA	1.12552	1.19	5	Pathogenic
A1789T	0.37	0.25	0.46	0.86	0.79	NA	NA	NA	NA	NA	NA	NA	NA	NA	NA	0.546	0.46	5	VUS
A622V	0.731707	0.540541	0.986622	0.364326	0.992544	NA	NA	NA	NA	NA	NA	NA	NA	NA	NA	0.723148	0.731707	5	Benign
C39G	2.38095	1.82301	2.05882	1.41818	1.89781	NA	NA	NA	NA	NA	NA	NA	NA	NA	NA	1.91576	1.89781	5	Pathogenic
C39Y	1.22261	1.98944	2.53475	2.03623	1.89205	NA	NA	NA	NA	NA	NA	NA	NA	NA	NA	1.93502	1.98944	5	Pathogenic
C44F	2.06074	2.02037	2.51534	2.46753	2.38245	NA	NA	NA	NA	NA	NA	NA	NA	NA	NA	2.28929	2.38245	5	Pathogenic
C44Y	2.21053	3.53887	2.98701	2.1374	2.79141	NA	NA	NA	NA	NA	NA	NA	NA	NA	NA	2.73305	2.79141	5	Pathogenic
C47G	1.37132	1.50323	1.22067	1.45047	1.49701	NA	NA	NA	NA	NA	NA	NA	NA	NA	NA	1.40854	1.45047	5	Pathogenic
C61G	2.18	2.38	2.2	1.88	1.89	1.52	NA	NA	NA	NA	NA	NA	NA	NA	NA	2.00833	2.035	6	Pathogenic
C64R	1.90892	1.92529	1.5009	1.79806	1.85484	NA	NA	NA	NA	NA	NA	NA	NA	NA	NA	1.7976	1.85484	5	Pathogenic
D67Y	0.906103	1.04839	0.619658	0.964863	1.04823	NA	NA	NA	NA	NA	NA	NA	NA	NA	NA	0.917449	0.964863	5	Benign
E1352K	1.35231	2.63773	2.46154	1.66337	1.0687	NA	NA	NA	NA	NA	NA	NA	NA	NA	NA	1.83673	1.66337	5	VUS
F1662S	0.719755	0.746269	0.684211	0.798631	0.592593	NA	NA	NA	NA	NA	NA	NA	NA	NA	NA	0.708292	0.719755	5	Benign
F486L	0.38	0.51	0.56	0.58	0.89	NA	NA	NA	NA	NA	NA	NA	NA	NA	NA	0.584	0.56	5	Benign
G1706E	1.70326	1.8759	1.52672	1.56403	1.51515	NA	NA	NA	NA	NA	NA	NA	NA	NA	NA	1.63701	1.56403	5	Pathogenic
G1738R	3.76761	4.63492	2.83333	3.36158	2.125	1.45455	NA	NA	NA	NA	NA	NA	NA	NA	NA	3.0295	3.09746	6	Pathogenic
G1788V	2.4	2.05882	2.75591	2.33333	1.83673	1.61572	NA	NA	NA	NA	NA	NA	NA	NA	NA	2.16675	2.19608	6	Pathogenic
I1275V	2.02082	0.827586	2.81437	2.14148	2.06897	NA	NA	NA	NA	NA	NA	NA	NA	NA	NA	1.97464	2.06897	5	Benign
I1766S	2.14	1.7	2.8	3.12	2.64	1.32	NA	NA	NA	NA	NA	NA	NA	NA	NA	2.28667	2.39	6	Pathogenic
I1858L	0.556046	0.663781	0.348485	0.447761	0.769231	NA	NA	NA	NA	NA	NA	NA	NA	NA	NA	0.557061	0.556046	5	Benign
K45Q	0.652985	0.609442	0.975434	0.899743	0.790668	NA	NA	NA	NA	NA	NA	NA	NA	NA	NA	0.785654	0.790667	5	Benign
L1764P	2.12181	2.21119	1.84697	3.23596	2.17786	NA	NA	NA	NA	NA	NA	NA	NA	NA	NA	2.31876	2.17786	5	Pathogenic
L22S	1.90083	1.95402	1.94969	1.73633	1.825	NA	NA	NA	NA	NA	NA	NA	NA	NA	NA	1.87317	1.90083	5	Pathogenic
L246V	0.782155	0.888889	1.11111	0.692588	0.635838	NA	NA	NA	NA	NA	NA	NA	NA	NA	NA	0.822116	0.782155	5	Benign
M1689R	2.28188	2.26496	1.5009	2.04819	2.78075	NA	NA	NA	NA	NA	NA	NA	NA	NA	NA	2.17534	2.26496	5	Pathogenic
M1775R	1.33621	1.18012	1.71429	1.77451	1.22222	1.46	NA	NA	NA	NA	NA	NA	NA	NA	NA	1.44789	1.3981	6	Pathogenic
N132K	2.71	1.22	1.71	2.2	1.78	2.77	NA	NA	NA	NA	NA	NA	NA	NA	NA	2.065	1.99	6	Benign
N1730I	1.34969	2.15983	5.62814	2.01278	1.07239	1.19845	NA	NA	NA	NA	NA	NA	NA	NA	NA	2.23688	1.68124	6	VUS
N1819S	2.15259	8.52713	8.53333	1.12903	5.3211	NA	NA	NA	NA	NA	NA	NA	NA	NA	NA	5.13264	5.3211	5	VUS
N550H	1.24	0.34	0.47	0.56	1.18	NA	NA	NA	NA	NA	NA	NA	NA	NA	NA	0.758	0.56	5	Benign
P1010S	0.821918	1.29032	0.842491	2.49191	1.26394	1.50307	1.01796	1.05572	NA	NA	NA	NA	NA	NA	NA	1.28592	1.15983	8	VUS
P1776H	1.13553	0.7	1.22141	0.78125	0.705882	1.64179	NA	NA	NA	NA	NA	NA	NA	NA	NA	1.03098	0.958391	6	Benign
P1859R	0.558269	0.763359	0.349956	0.462046	0.561798	NA	NA	NA	NA	NA	NA	NA	NA	NA	NA	0.539086	0.558269	5	Benign
pYES2	0.56	0.52	0.36	0.58	0.51	0.47	0.675	0.666667	0.535714	0.618557	0.511811	0.635838	0.598802	0.47138	0.57377	0.552503	0.56	15	Other.reference
Q356R	0.620493	0.511628	0.702703	0.660337	0.575264	NA	NA	NA	NA	NA	NA	NA	NA	NA	NA	0.614085	0.620493	5	Benign
Q804H	0.480192	0.727817	0.483577	0.791557	0.515464	NA	NA	NA	NA	NA	NA	NA	NA	NA	NA	0.599721	0.515464	5	Benign
R1347G	0.680272	0.803994	0.520021	0.592784	0.733333	NA	NA	NA	NA	NA	NA	NA	NA	NA	NA	0.666081	0.680272	5	Benign
R1495M	0.64	0.32	0.44	0.41	0.5	NA	NA	NA	NA	NA	NA	NA	NA	NA	NA	0.462	0.44	5	Pathogenic
R1699W	1.95122	2.49027	2.19841	1.96296	2.11321	NA	NA	NA	NA	NA	NA	NA	NA	NA	NA	2.14322	2.11321	5	Pathogenic
R71K	0.574713	0.305164	0.584666	0.789608	0.790698	NA	NA	NA	NA	NA	NA	NA	NA	NA	NA	0.60897	0.584666	5	Pathogenic
R841W	0.319149	0.502513	0.748874	0.786885	0.610687	NA	NA	NA	NA	NA	NA	NA	NA	NA	NA	0.593622	0.610687	5	Benign
S1040N	0.69	0.45	0.54	0.53	0.67	NA	NA	NA	NA	NA	NA	NA	NA	NA	NA	0.576	0.54	5	Benign
S1140G	0.99	0.45	0.67	0.8	0.76	NA	NA	NA	NA	NA	NA	NA	NA	NA	NA	0.734	0.76	5	Benign
S1164I	0.910526	1.47508	1.32773	1.09262	1.40586	1.16379	NA	NA	NA	NA	NA	NA	NA	NA	NA	1.22927	1.24576	6	VUS
S1512I	1.08	0.78	0.88	0.63	0.54	NA	NA	NA	NA	NA	NA	NA	NA	NA	NA	0.782	0.78	5	Benign
S1715R	2.5	2.65625	2.05078	2.0339	2.65487	NA	NA	NA	NA	NA	NA	NA	NA	NA	NA	2.37916	2.5	5	Pathogenic
S592N	6.1791	2.91444	3.12741	2.27368	1.33005	NA	NA	NA	NA	NA	NA	NA	NA	NA	NA	3.16494	2.91444	5	VUS
T1675I	1.04676	1.55769	1.57186	1.49287	1.77419	NA	NA	NA	NA	NA	NA	NA	NA	NA	NA	1.48867	1.55769	5	Benign
T1685A	1.2493	1.76985	1.49171	1.67376	1.55556	NA	NA	NA	NA	NA	NA	NA	NA	NA	NA	1.54804	1.55556	5	Pathogenic
T1720A	0.529101	0.653951	0.673367	0.52551	0.564756	NA	NA	NA	NA	NA	NA	NA	NA	NA	NA	0.589337	0.564756	5	Benign
T37K	1.24764	1.3253	2.11268	1.49837	1.35364	NA	NA	NA	NA	NA	NA	NA	NA	NA	NA	1.50752	1.35364	5	Pathogenic
T826K	0.952381	1.05932	0.756303	0.75643	0.206349	NA	NA	NA	NA	NA	NA	NA	NA	NA	NA	0.746157	0.75643	5	Benign
V1791L	0.631579	0.681818	1.24533	0.966851	0.745342	NA	NA	NA	NA	NA	NA	NA	NA	NA	NA	0.854184	0.745342	5	VUS
V1838E	1.4553	1.55172	1.63127	1.14865	1.58996	NA	NA	NA	NA	NA	NA	NA	NA	NA	NA	1.47538	1.55172	5	Pathogenic
wt	0.5	0.77	0.82	0.82	0.59	0.52	0.64	NA	NA	NA	NA	NA	NA	NA	NA	0.665714	0.64	7	WT.reference
Y1703C	1.67785	1.33758	1.11111	0.909091	1.16279	NA	NA	NA	NA	NA	NA	NA	NA	NA	NA	1.23968	1.16279	5	VUS
Y179C	0.7	0.81	0.75	0.38	0.27	NA	NA	NA	NA	NA	NA	NA	NA	NA	NA	0.582	0.7	5	Benign
Results expressed GR frequency, are reported for any independent experiment. Mean, median and prior classification are also reported
