# Supplementary material for: Validation and Data-Integration of Yeast-Based Assays for Functional Classification of BRCA1 Missense Variants
Source: Int J Mol Sci. 2022 Apr 6;23(7):4049. doi: 10.3390/ijms23074049 (PMC8999655; doi:10.3390/ijms23074049)
Supplement: Supplementary file 1 [file ijms-23-04049-s001.zip › Table S5.xlsx]

## Sheet: Table S5
Table S5: Effect of BRCA1 missense variants on SCP assay
Name	Batch1	Batch2	Batch3	Batch4	Batch5	Batch6	Batch7	Batch8	Batch9	Batch10	Batch11	Batch12	Batch13	Batch14	Batch15	Batch16	Mean	Median	NSample	Prior_classif
A1669S	19	13.9	20.05	17.65	18.5333	NA	NA	NA	NA	NA	NA	NA	NA	NA	NA	NA	17.8267	18.5333	5	VUS
A1708E	152.5	166.167	149	173.667	121.667	NA	NA	NA	NA	NA	NA	NA	NA	NA	NA	NA	152.6	152.5	5	Pathogenic
A1789T	227.333	260	196	186.667	181.667	NA	NA	NA	NA	NA	NA	NA	NA	NA	NA	NA	210.333	196	5	VUS
A622V	16.3333	16.1	18.0667	19.3	18.7667	NA	NA	NA	NA	NA	NA	NA	NA	NA	NA	NA	17.7133	18.0667	5	Benign
C39G	49	50.4	48.5	53.3	59.3	NA	NA	NA	NA	NA	NA	NA	NA	NA	NA	NA	52.1	50.4	5	Pathogenic
C39Y	46	52	54.6	41.4	55	NA	NA	NA	NA	NA	NA	NA	NA	NA	NA	NA	49.8	52	5	Pathogenic
C44F	126	145	156.8	139.2	126.5	NA	NA	NA	NA	NA	NA	NA	NA	NA	NA	NA	138.7	139.2	5	Pathogenic
C44Y	144	158	181	185.5	191.5	NA	NA	NA	NA	NA	NA	NA	NA	NA	NA	NA	172	181	5	Pathogenic
C47G	40	32.5	43.9	49	57	NA	NA	NA	NA	NA	NA	NA	NA	NA	NA	NA	44.48	43.9	5	Pathogenic
C61G	24.8333	27.1667	27.1667	40	34	NA	NA	NA	NA	NA	NA	NA	NA	NA	NA	NA	30.6333	27.1667	5	Pathogenic
C64R	381	432	481	399	324	NA	NA	NA	NA	NA	NA	NA	NA	NA	NA	NA	403.4	399	5	Pathogenic
D67Y	15	12	15.45	17.9	14.8	NA	NA	NA	NA	NA	NA	NA	NA	NA	NA	NA	15.03	15	5	Benign
E1352K	32.66	58	67.33	71	55	NA	NA	NA	NA	NA	NA	NA	NA	NA	NA	NA	56.798	58	5	VUS
F1662S	12	15.71	22.3	16.67	14.8	NA	NA	NA	NA	NA	NA	NA	NA	NA	NA	NA	16.296	15.71	5	Benign
F486L	16.8333	14.1667	14.1667	18.8	11	NA	NA	NA	NA	NA	NA	NA	NA	NA	NA	NA	14.9933	14.1667	5	Benign
G1706E	316.6	360	453	290	325	NA	NA	NA	NA	NA	NA	NA	NA	NA	NA	NA	348.92	325	5	Pathogenic
G1738R	80.6667	79.3333	89.8333	86	94.8333	NA	NA	NA	NA	NA	NA	NA	NA	NA	NA	NA	86.1333	86	5	Pathogenic
G1788V	136.333	127.667	136.167	147	127	NA	NA	NA	NA	NA	NA	NA	NA	NA	NA	NA	134.833	136.167	5	Pathogenic
I1275V	220	203	180	202	199	NA	NA	NA	NA	NA	NA	NA	NA	NA	NA	NA	200.8	202	5	Benign
I1766S	214	238	214	216	280	NA	NA	NA	NA	NA	NA	NA	NA	NA	NA	NA	232.4	216	5	Pathogenic
I1858L	19.7	16.25	17.5	14.5	16.35	NA	NA	NA	NA	NA	NA	NA	NA	NA	NA	NA	16.86	16.35	5	Benign
K45Q	20	19.2	18.8667	18.8667	26.2	NA	NA	NA	NA	NA	NA	NA	NA	NA	NA	NA	20.6267	19.2	5	Benign
L1764P	167	220	89	189	210	NA	NA	NA	NA	NA	NA	NA	NA	NA	NA	NA	175	189	5	Pathogenic
L22S	80.1	89.5333	94.4333	77.4333	81.7667	NA	NA	NA	NA	NA	NA	NA	NA	NA	NA	NA	84.6533	81.7667	5	Pathogenic
L246V	25	16	8	12	15	NA	NA	NA	NA	NA	NA	NA	NA	NA	NA	NA	15.2	15	5	Benign
M1689R	132.767	112.333	128.433	125.1	133.467	NA	NA	NA	NA	NA	NA	NA	NA	NA	NA	NA	126.42	128.433	5	Pathogenic
M1775R	83	75.6667	75.3333	81	85	NA	NA	NA	NA	NA	NA	NA	NA	NA	NA	NA	80	81	5	Pathogenic
N132K	9.5	11.1667	12	11	12.6667	NA	NA	NA	NA	NA	NA	NA	NA	NA	NA	NA	11.2667	11.1667	5	Benign
N1730I	28.6667	84	76	23	21	NA	NA	NA	NA	NA	NA	NA	NA	NA	NA	NA	46.5333	28.6667	5	VUS
N1819S	27.3333	18	61.33	34	30	NA	NA	NA	NA	NA	NA	NA	NA	NA	NA	NA	34.1327	30	5	VUS
N550H	17	17.33	10.5	22.5	12.5	NA	NA	NA	NA	NA	NA	NA	NA	NA	NA	NA	15.966	17	5	Benign
P1010S	17.3333	14.8333	11.6667	30.6667	13.5	NA	NA	NA	NA	NA	NA	NA	NA	NA	NA	NA	17.6	14.8333	5	VUS
P1776H	22.6667	16.1	16.3333	23.1667	16.1667	NA	NA	NA	NA	NA	NA	NA	NA	NA	NA	NA	18.8867	16.3333	5	Benign
P1859R	29	20.55	15.5	13.95	12.85	NA	NA	NA	NA	NA	NA	NA	NA	NA	NA	NA	18.37	15.5	5	Benign
pYES2	223.333	240.333	273.333	341	244	282	248.5	258.25	321.667	265.5	NA	NA	NA	NA	NA	NA	269.792	261.875	10	WT.reference
Q356R	14.7667	15.3333	11.2333	12.6	11.4333	NA	NA	NA	NA	NA	NA	NA	NA	NA	NA	NA	13.0733	12.6	5	Benign
Q804H	12.9	10.55	14	16	16.45	NA	NA	NA	NA	NA	NA	NA	NA	NA	NA	NA	13.98	14	5	Benign
R1347G	23	29.45	22	20	17.9	NA	NA	NA	NA	NA	NA	NA	NA	NA	NA	NA	22.47	22	5	Benign
R1495M	90.8333	99.3333	152.5	158.5	156	NA	NA	NA	NA	NA	NA	NA	NA	NA	NA	NA	131.433	152.5	5	Pathogenic
R1699W	109	195	155	153	159	NA	NA	NA	NA	NA	NA	NA	NA	NA	NA	NA	154.2	155	5	Pathogenic
R71K	17.5	21	28	30	27	NA	NA	NA	NA	NA	NA	NA	NA	NA	NA	NA	24.7	27	5	Pathogenic
R841W	11.6667	10.1	9.4	11.8667	10.8667	NA	NA	NA	NA	NA	NA	NA	NA	NA	NA	NA	10.78	10.8667	5	Benign
S1040N	14	17	18	24	24	NA	NA	NA	NA	NA	NA	NA	NA	NA	NA	NA	19.4	18	5	Benign
S1140G	9	12.3333	19	19.5	24	NA	NA	NA	NA	NA	NA	NA	NA	NA	NA	NA	16.7667	19	5	Benign
S1164I	20.8333	12	9	14.1667	22	NA	NA	NA	NA	NA	NA	NA	NA	NA	NA	NA	15.6	14.1667	5	VUS
S1512I	51.3333	49.3333	55.3333	55.5	55.8333	NA	NA	NA	NA	NA	NA	NA	NA	NA	NA	NA	53.4667	55.3333	5	Benign
S1715R	204	227	198.75	209.917	204.333	NA	NA	NA	NA	NA	NA	NA	NA	NA	NA	NA	208.8	204.333	5	Pathogenic
S592N	22.6667	57.33	96	87	62	NA	NA	NA	NA	NA	NA	NA	NA	NA	NA	NA	64.9993	62	5	VUS
T1675I	17.35	19.1	16	17.47	16.8933	NA	NA	NA	NA	NA	NA	NA	NA	NA	NA	NA	17.3627	17.35	5	Benign
T1685A	243	298	281	250	263	NA	NA	NA	NA	NA	NA	NA	NA	NA	NA	NA	267	263	5	Pathogenic
T1720A	21.4333	26.6667	28.1	20.8	24.6667	NA	NA	NA	NA	NA	NA	NA	NA	NA	NA	NA	24.3333	24.6667	5	Benign
T37K	47.2	59.5333	69.6667	70.6667	60.3333	NA	NA	NA	NA	NA	NA	NA	NA	NA	NA	NA	61.48	60.3333	5	Pathogenic
T826K	18	17.8	15	18.4	14.65	NA	NA	NA	NA	NA	NA	NA	NA	NA	NA	NA	16.77	17.8	5	Benign
V1791L	59	55	66.5	46.4	48	NA	NA	NA	NA	NA	NA	NA	NA	NA	NA	NA	54.98	55	5	VUS
V1838E	347	276	326	320	300	NA	NA	NA	NA	NA	NA	NA	NA	NA	NA	NA	313.8	320	5	Pathogenic
wt	19.3333	15.6667	21.3333	17.5	13.3333	17	12.5	18	20.3333	23	16.3	15.5	14.9	20.3333	19	16.3333	17.5229	17.25	16	Other.reference
Y1703C	107.433	109.767	109.433	114.333	113.133	NA	NA	NA	NA	NA	NA	NA	NA	NA	NA	NA	110.82	109.767	5	VUS
Y179C	12.1667	15	10.3333	11.8333	15	NA	NA	NA	NA	NA	NA	NA	NA	NA	NA	NA	12.8667	12.1667	5	Benign
Results expressed number of cells x 103, are reported for any independent experiment. Mean, median and prior classification are also reported
