# Supplementary material for: Validation and Data-Integration of Yeast-Based Assays for Functional Classification of BRCA1 Missense Variants
Source: Int J Mol Sci. 2022 Apr 6;23(7):4049. doi: 10.3390/ijms23074049 (PMC8999655; doi:10.3390/ijms23074049)
Supplement: Supplementary file 1 [file ijms-23-04049-s001.zip › Table S6.xlsx]

## Sheet: Table S6
Table S6: Functional impact of the pathogenic and benign variants in the yeast based assays.
		Interchromosomal		Intrachromosomal		Gene reversion		Small colony
Variant	Prior Classification	Predicted score	Functional impact	Predicted score	Functional impact	Predicted score	Functional impact	Predicted score	Functional impact	Pathogenic votes	Pathogenic prediction score	Final prediction
A1708E	Pathogenic	0.00075	Benign	0.24675	Pathogenic	0.60375	Pathogenic	0.99975	Pathogenic	3	0.75	Pathogenic
A622V	Benign	0.00025	Benign	0.00025	Benign	0.00225	Benign	0.00025	Benign	0	0	Benign
C39G	Pathogenic	0.99975	Pathogenic	0.99975	Pathogenic	0.99975	Pathogenic	0.99975	Pathogenic	4	1	Pathogenic
C39Y	Pathogenic	0.99925	Pathogenic	0.99975	Pathogenic	0.99975	Pathogenic	0.99975	Pathogenic	4	1	Pathogenic
C44F	Pathogenic	0.99975	Pathogenic	0.99975	Pathogenic	0.99975	Pathogenic	0.99975	Pathogenic	4	1	Pathogenic
C44Y	Pathogenic	0.99975	Pathogenic	0.88275	Pathogenic	0.99975	Pathogenic	0.99975	Pathogenic	4	1	Pathogenic
C47G	Pathogenic	0.93975	Pathogenic	0.92025	Pathogenic	0.95175	Pathogenic	0.99925	Pathogenic	4	1	Pathogenic
C61G	Pathogenic	0.98625	Pathogenic	0.95125	Pathogenic	0.99975	Pathogenic	0.70425	Pathogenic	4	1	Pathogenic
C64R	Pathogenic	0.99975	Pathogenic	0.40775	Pathogenic	0.99975	Pathogenic	0.99975	Pathogenic	4	1	Pathogenic
D67Y	Benign	0.00025	Benign	0.00025	Benign	0.2275	Benign	0.00025	Benign	0	0	Benign
F1662S	Benign	0.00025	Benign	0.00025	Benign	0.00225	Benign	0.00025	Benign	0	0	Benign
F486L	Benign	0.00025	Benign	0.00025	Benign	0.00025	Benign	0.00025	Benign	0	0	Benign
G1706E	Pathogenic	0.99775	Pathogenic	0.93175	Pathogenic	0.99225	Pathogenic	0.99975	Pathogenic	4	1	Pathogenic
G1738R	Pathogenic	0.99025	Pathogenic	0.97425	Pathogenic	0.99975	Pathogenic	0.99975	Pathogenic	4	1	Pathogenic
G1788V	Pathogenic	0.99525	Pathogenic	0.99975	Pathogenic	0.99975	Pathogenic	0.99975	Pathogenic	4	1	Pathogenic
I1275V	Benign	0.89975	Pathogenic	0.87325	Pathogenic	0.99975	Pathogenic	0.99975	Pathogenic	4	1	Pathogenic
I1766S	Pathogenic	0.53225	Pathogenic	0.98225	Pathogenic	0.99975	Pathogenic	0.99975	Pathogenic	4	1	Pathogenic
I1858L	Benign	0.00025	Benign	0.00275	Benign	0.00025	Benign	0.00025	Benign	0	0	Benign
K45Q	Benign	0.00025	Benign	0.00025	Benign	0.01225	Benign	0.00025	Benign	0	0	Benign
L1764P	Pathogenic	0.99975	Pathogenic	0.99975	Pathogenic	0.99975	Pathogenic	0.99975	Pathogenic	4	1	Pathogenic
L22S	Pathogenic	0.71175	Pathogenic	0.24675	Pathogenic	0.99975	Pathogenic	0.99975	Pathogenic	4	1	Pathogenic
L246V	Benign	0.04175	Benign	0.00025	Benign	0.00725	Benign	0.00025	Benign	0	0	Benign
M1689R	Pathogenic	0.6775	Pathogenic	0.9955	Pathogenic	0.99975	Pathogenic	0.99975	Pathogenic	4	1	Pathogenic
M1775R	Pathogenic	0.89675	Pathogenic	0.86575	Pathogenic	0.929	Pathogenic	0.99975	Pathogenic	4	1	Pathogenic
N132K	Benign	0.00075	Benign	0.06425	Benign	0.99975	Pathogenic	0.00025	Benign	1	0.25	Benign
N550H	Benign	0.00025	Benign	0.00025	Benign	0.00025	Benign	0.00025	Benign	0	0	Benign
P1776H	Benign	0.00925	Benign	0.62275	Pathogenic	0.22175	Benign	0.00025	Benign	1	0.25	Benign
P1859R	Benign	0.00025	Benign	0.00025	Benign	0.00025	Benign	0.00025	Benign	0	0	Benign
Q356R	Benign	0.00025	Benign	0.00025	Benign	0.00025	Benign	0.00025	Benign	0	0	Benign
Q804H	Benign	0.00025	Benign	0.00025	Benign	0.00025	Benign	0.00025	Benign	0	0	Benign
R1347G	Benign	0.00025	Benign	0.99975	Pathogenic	0.00175	Benign	0.01775	Benign	1	0.25	Benign
R1495M	Pathogenic	0.99975	Pathogenic	0.99925	Pathogenic	0.00025	Benign	0.99975	Pathogenic	3	0.75	Pathogenic
R1699W	Pathogenic	0.00075	Benign	0.95175	Pathogenic	0.99975	Pathogenic	0.99975	Pathogenic	3	0.75	Pathogenic
R71K	Pathogenic	0.00025	Benign	0.00025	Benign	0.00025	Benign	0.68975	Pathogenic	1	0.25	Benign
R841W	Benign	0.00025	Benign	0.00025	Benign	0.00025	Benign	0.00025	Benign	0	0	Benign
S1040N	Benign	0.00375	Benign	0.00025	Benign	0.00025	Benign	0.00025	Benign	0	0	Benign
S1140G	Benign	0.11125	Benign	0.00325	Benign	0.0035	Benign	0.00025	Benign	0	0	Benign
S1512I	Benign	0.03875	Benign	0.34875	Pathogenic	0.00725	Benign	0.99975	Pathogenic	2	0.5	Benign
S1715R	Pathogenic	0.99975	Pathogenic	0.99975	Pathogenic	0.99975	Pathogenic	0.99975	Pathogenic	4	1	Pathogenic
T1675I	Benign	0.00025	Benign	0.00025	Benign	0.99175	Pathogenic	0.00025	Benign	1	0.25	Benign
T1685A	Pathogenic	0.99925	Pathogenic	0.99975	Pathogenic	0.99175	Pathogenic	0.99975	Pathogenic	4	1	Pathogenic
T1720A	Benign	0.00025	Benign	0.00025	Benign	0.00025	Benign	0.18275	Benign	0	0	Benign
T37K	Pathogenic	0.99975	Pathogenic	0.80675	Pathogenic	0.89675	Pathogenic	0.99975	Pathogenic	4	1	Pathogenic
T826K	Benign	0.00025	Benign	0.00025	Benign	0.0035	Benign	0.00025	Benign	0	0	Benign
V1838E	Pathogenic	0.96575	Pathogenic	0.99975	Pathogenic	0.99125	Pathogenic	0.99975	Pathogenic	4	1	Pathogenic
Y179C	Benign	0.76575	Pathogenic	0.30575	Pathogenic	0.00225	Benign	0.00025	Benign	2	0.5	Benign
For each variant prior classification is reported according to the databases ( see Table S1 for details). Predicted scores and functional impact, determined by using the ProClass Toolbox (http://xfer.curie.fr/get/tvsjyy4dUno/ProClass_toolbox.zip), are reported for any assay. Pathogenic votes represent basically the total number of pathogenic labels; pathogenic prediction scores are calculated by …
