# Supplementary material for: Validation and Data-Integration of Yeast-Based Assays for Functional Classification of BRCA1 Missense Variants
Source: Int J Mol Sci. 2022 Apr 6;23(7):4049. doi: 10.3390/ijms23074049 (PMC8999655; doi:10.3390/ijms23074049)
Supplement: Supplementary file 1 [file ijms-23-04049-s001.zip › Table S7.xlsx]

## Sheet: Table of Primers
	Table S7: List of Primers used for site-specific mutagenesis
	name	sequence
	T65C FOR	5’ GCTATGCAGAAAATCTCAGAGTGTCCCATCTGTCTG 3’
	T65C REV	5’ CAGACAGATGGGACACTCTGAGATTTTCTGCATAGC 3’
	C110A FOR	5’ CAAGGAACCTGTCTCCAAAAAGTGTGACCACATATTTTG 3’
	C110A REV	5’ CAAAATATGTGGTCACACTTTTTGGAGACAGGTTCCTTG 3’
	T115G FOR	5' GGAACCTGTCTCCACAAAGGGTGACCACATATTTTGC 3'
	T115G REV	5' GCAAAATATGTGGTCACCCTTTGTGGAGACAGGTTCC 3'
	G116A FOR	5' CCTGTCTCCACAAAGTATGACCACATATTTTGC 3'
	G116A REV	5' GCAAAATATGTGGTCATACTTTGTGGAGACAGG 3'
	G131T FOR	5' GTGTGACCACATATTTGGCAAATTTTGCATGCTG 3'
	G131T REV	5' CAGCATGCAAAATTTGCCAAATATGTGGTCACAC 3'
	G131A FOR	5' CAAAGTGTGACCACATATTTTTCAAATTTTGCATGCTGAAAC 3'
	G131A REV	5' GTTTCAGCATGCAAAATTTGAAAAATATGTGGTCACACTTTG 3'
	A133C FOR	5’ GTGTGACCACATATTTTGCCAATTTTGCATGCTGAAACTTCTC 3’
	A133C REV	5’ GAGAAGTTTCAGCATGCAAAATTGGCAAAATATGTGGTCACAC 3’
	T139G FOR	5' CCACATATTTTGCAAATTTGGCATGCTGAAACTTCTCAACC 3'
	T139G REV	5' GGTTGAGAAGTTTCAGCATGCCAAATTTGCAAAATATGTGG 3'
	T181G FOR	5' GAAGAAAGGGCCTTCACAGGGTCC TTTATGTAAGAATGA 3'
	T181G REV	5' TCATTCTTACATAAAGGACCCTGTGAGGCCCTTTCTTC 3'
	T190C FOR	5' CCTTCACAGTGTCCTTTACGTAAGAATGATATAACC 3'
	T190C REV	5' GGTTATATCATTCTTACGTAAAGGACACTGTGAAGG 3'
	G199T FOR	5' GTGTCCTTTATGTAAGAATTATATAACCAAAAGGAGCCTACAAG 3'
	G199T REV	5' CTTGTAGGCTCCTTTTGGTTATATAATTCTTACATAAAGGACAC 3'
	G212A FOR	5' GAATGATATAACCAAAAAGAGCCTACAAGAAAGTACG 3'
	G212A REV	5' CGTACTTTCTTGTAGGCTCTTTTTGGTTATATCATTC 3'
	C396A FOR	5' CAAAGTATGGGCTACAGAAAACGTGCCAAAAGACTTCTACA 3'
	C396A REV	5' TGTAGAAGTCTTTTGGCACGTTTTCTGTAGCCCATACTTTG 3'
	A536G FOR	5' CTCAAAAGACGTCTGTCTGCATTGAATTGGGATCTG 3'
	A536G REV	5' CAGATCCCAATTCAATGCAGACAGACGTCTTT TGAG 3'
	T736G FOR	5’ CAACCCAGTAATAATGATGTGAACACCACTGAGAAGCGTGC 3’
	T736G REV	5’ GCACGCTTCTCAGTGGTGTTCACATCATTATTACTGGGTTG 3’
	A1067G FOR	5’ AGAAAAGAATGGAATAAGCGGAAACTGCCATGCTCAGAG 3’
	A1067G REV	5’ CTCTGAGCATGGCAGTTTCCGCTTATTCCATTCTTTTCT 3’
	T1456C FOR	5' CTGAAAATCTAATTATAGGAGCACTTGTT ACTGAGCCACAGATA 3'
	T1456C REV	5' TATCTGTGGCTCAGTAACAAGTGCTCCTATAATTAGATTTTCAG 3'
	A1648C FOR	5' GGTCAAGTGATGAAT ATTACTCATAGTGGTCATGAGAATAAAACAA 3'
	A1648C REV	5' TTGTTTTATTCTCATGACCACATAGAGTAATATTCATCACTTGACC 3'
	G1775A FOR	5' CTGAACCTATAAGCAGCAGTATAAACAATATGGAACTCGAATTAAATAT 3'
	G1775A REV	5' ATATTTAATTCGAGTTCCATATTGTTTATACTGCTGCTTATAGGTTCAG 3'
	C1865T FOR	5’ CTACCAGGCATATTCATGTGCTTGAACTAGTAGTCAG 3’
	C1865T REV	5’ CTGACTACTAGTTCAAGCACATGAATATGCCTGGTAG 3’
	G2412C FOR	5’ CAGAACCAAATAAATGTGTGAGTCACTGTGCAGCATTTG 3’
	G2412C REV	5’ CAAATGCTGCACAGTGACTCACACATTTATTTGGTTCTG 3’
	C2596A FOR	5’ CATTCAAGGTTTCAAAGAGCCAGTCATTTGCTCCG 3’
	C2596A REV	5’ CGGAGCAAATGACTGGCTCTTTGAAACCTTGAATG 3’
	C2640T FOR	5’ TGGGACATGAAGTTAACCACAGTTGGGAAACAAGCA 3’
	C2640T REV	5’ TGCTTGTTTCCCAACTGTGGTTAACTTCATGTCCCA 3’
	C3028T FOR	5' CTTTGAGGAACATTCAATGTCATCTGAAAGAGAAATGGGAAATGA 3'
	C3028 REV	5' TCATTTCCCATTTCTCTTTCAGATGACAT TGAATGTTCCTCAAAG 3'
	G3119A FOR	5' TTTAAAGAAGCCAACTCAAGCAAT 3'
	G3119A REV	5' ATTGCTTGAGTTGGCTTCTTTAAA 3'
	A3418G FOR	5' GAACAGCCTATGGGAAGTGGTCATGCATCTCAGGTTT 3'
	A3418G REV	5' AAACCTGAGATGCATGACCAC TTCCCA TAGGCTGTTC 3'
	G3491T FOR	5' GAAATAAAGGAAGATACTATTTTTGCTGAAAATGACATT 3'
	G3491T REV	5' AATGTCATTTTCAGCAAAAATAGTATCTTCCTTTATTTC 3'
	A3823G FOR	5’ GACTGCAGTAACCAGGTAGTATTGGCAAAGGCATCTCAGG 3’
	A3823G REV	5’ CCTGAGATGCCTTTGCCAATACTACCTGGTTACTGCAGTC 3’
	A4039G FOR	5’ GGTTTCAGATGATGAAGAAGGAGGAACGGGCTTGGAAG 3’
	A4039G REV	5’ CTTCCAAGCCCGTTCCTCCTTCTTCATCATCTGAAACC 3’
	G4054A FOR	5' AAGAAAGAGGAACGGGCTTGAAAGAAAATAATCAAGAAGAGC 3'
	G4054A REV	5' GCTCTTCTTGATTATTTTCTTTCAAGCCCGTTCCTCTTTCTT 3'
	G4484T FOR	5' CCAGGAGTGGAAATGTCATCCCCT 3'
	G4484T REV	5' AGGGGATGACATTTCCACTCCTGG 3'
	G4535T FOR	5' GGTGGTACATGCACATTTGCTCTGGGAGTCTTCA 3'
	G4535T REV	5' TGAAGACTCCCAGAGCAAATGTGCATGTACCACC 3'
	T4985C FOR	5' GCCTGACCCCAGAAGAATCTATGCTCGTGTACAAGTTTGC 3'
	T4985C REV	5' CAAACTTGTACACGAGCATAGATTCTTCTGGGGTCAGGC 3'
	G5005T FOR	5' GCTCGTGTACAAGTTTTCCAGAAAACACCACATCAC 3'
	G5005T REV	5' GTGATGTGGTGTTTTCTGGAAAACTTGTACACGAGC 3'
	C5024T FOR	5’ GCCAGAAAACACCACATCATTTTAACTAATCTAATTACTGAAG 3’
	C5024T REV	5’ CTTCAGTAATTAGATTAGTTAAAATGATGTGGTGTTTTCTGGC 3’
	A5053G FOR	5’ TCTAATTACTGAAGAGACTGCTCATGTTGTTATGAAAACAGATGC 3’
	A5053G REV	5’ GCATCTGTTTTCATAACAACATGAGCAGTCTCTTCAGTAATTAGA 3’
	T5066G FOR	5' GAGACTACTCATGTTGTTAGGAAAACAGATGCTGAGTTTGTGT 3'
	T5066G REV	5' ACACAAACTCAGCATCTGTTTTCCTAACAACATGAGTAGTCTC 3'
	C5095T FOR	5' GATGCTGAGTTTGTGTGTGAATGGACACTGAAATATTTTCTAG 3'
	C5095T REV	5' CTAGAAAATATTTCAGTGTCCATTCACACACAAACTCAGCATC 3'
	A5108G FOR	5’ GTGAACGGACACTGAAATGTTTTCTAGGAATTGCGGGAGG 3’
	A5108G REV	5’ CCTCCCGCAATTCCTAGAAAACATTTCAGTGTCCGTTCAC 3’
	G5117A FOR	5' CGGACACTGAAATATTTTCTAGAAATTGCGGGAGG 3'
	G5117A REV	5' CCTCCCGCAATTTCTAGAAAATATTTCAGTGTCCG 3'
	C5123A FOR	5'GAAATATTTTCTAGGAATTGAGGGAGGAAAATGGGTAGTTA 3'
	C5123A REV	5' TAACTACCCATTTTCCTCCCTCAATTCCTAGAAAATATTTC 3'
	A5143C FOR	5' GAGGAAAATGGGTAGTTCGCTATTTCTGGGTGACC 3'
	A5143C REV	5' GGTCACCCAGAAATAGCGAACTACCCATTTTCCTC 3'
	A5158G FOR	5’ GTTAGCTATTTCTGGGTGGCCCAGTCTATTAAAGAAAG 3’
	A5158G REV	5’ CTTTCTTTAATAGACTGGGCCACCCAGAAATAGCTAAC 3’
	A5189T FOR	5' CCCAGTCTATTAAAGAAAGAAAAATGCTGATTGAGCATGATTTTGAA 3'
	A5189T REV	5' TTCAAAATCATGCTCAATCAGCATTTTTCTTTCTTTAATAGACTGGG 3'
	G5212A FOR	5’ GCATGATTTTGAAGTCAGAAGAGATGTGGTCAATGGAAG 3’
	G5212A REV	5’ CTTCCATTGACCACATCTCTTCTGACTTCAAAATCATGC 3’
	T5291C FOR	5’ GGACAGAAAGATCTTCAGGGGGCCAGAAATCTGTTGCTATGGGC 3’
	T5291C REV	5’ GCCCATAGCAACAGATTTCTGGCCCCCTGAAGATCTTTCTGTCC 3’
	T5297G FOR	5' CAGGGGGCTAGAAAGCTGTTGCTATGGGCC 3'
	T5297G REV	5'GGCCCATAGCAACAGCTTTCTAGCCCCCT 3'
	T5324G FOR	5' TATGGGCCCTTCACCAACAGGCCCACAGATCAACTGGAA 3'
	T5324G REV	5' TTCCAGTTGATCTGTGGGCCTGTTGGTGAAGGGCCCATA 3'
	C5327A FOR	5’ CCCTTCACCAACATGCACACAGATCAACTGG 3’
	C5327A REV	5’ CCAGTTGATCTGTGTGCATGTTGGTGAAGGG 3’
	G5363T FOR	5' GATGGTACAGCTGTGTGTTGCTTCTGTGGTGAAG 3'
	G5363T REV	5' CTTCACCACAGAAGCAACACACAGCTGTACCATC 3'
	T5365A FOR	5' GGTACAGCTGTGTGGTACTTCTGTGGTGAAGGAG 3'
	T5365A REV	5' CTCCTTCACCACAGAAGTACCACACAGCTGTACC 3'
	G5371T FOR	5’ GGTACAGCTGTGTGGTGCTTCTTTGGTGAAGGAGCTTTC 3’
	G5371T REV	5’ GAAAGCTCCTTCACCAAAGAAGCACCACACAGCTGTACC 3’
	A5456G FOR	5' TGCCTGGACAGAGGACAGTGGCTTCCATGC 3'
	A5456G REV	5' GCATGGAAGCCACTGTCCTCTGTCCAGGCA 3'
	T5513A FOR	5’ GGTGACCCGAGAGTGGGAGTTGGACAGTGTAGC 3’
	T5513A REV	5’ GCTACACTGTCCAACTCCCACTCTCGGGTCACC 3’
	A5572C FOR	5’ GGACACCTACCTGATACCCCAGCTCCCCCACAGCCAC 3’
	A5572C REV	5’ GTGGCTGTGGGGGAGCTGGGGTATCAGGTAGGT 3’
	C5576G FOR	5’ CCTACCTGATACCCCAGATCCCGCACAGCCACTAC 3’
	C5576G REV	5’ GTAGTGGCTGTGCGGGATCTGGGGTATCAGGTAGG 3’
	Primers are named like the nucleotide that has been changed; FOR, forward and REV reverse
